# Supplementary material
Source: PubMed Central journal article supplement (PMC11302589)

## Supplementary Information

for

### Synthesis of selective inhibitors against *V. cholerae* sialidase and human cytosolic sialidase NEU2

Zahra Khedri,<sup>‡a</sup> Yanhong Li,<sup>‡a</sup> Hongzhi Cao,<sup>a,b</sup> Jingyao Qu,<sup>a</sup> Hai Yu,<sup>a</sup> Musleh M. Muthana,<sup>a</sup>  
Xi Chen<sup>\*a</sup>

<sup>a</sup> Department of Chemistry, University of California, One Shields Avenue, Davis, California 95616, USA. E-mail: chen@chem.ucdavis.edu; Fax: +1 530-752-8995; Tel: +1 530-754-6037

<sup>b</sup> Current address: National Glycoengineering Research Center, Shandong University, Jinan, Shandong 250012, China

<sup>‡</sup>These authors contributed equally.

\*Correspondence: Xi Chen, Ph. D.; Fax: 01-530-752-8995; Tel: 01-530-754-6037; E-mail: xiichen@ucdavis.edu

|                                                                                                                                                                                                                                                                                  |         |
|----------------------------------------------------------------------------------------------------------------------------------------------------------------------------------------------------------------------------------------------------------------------------------|---------|
| <b>Figure S1.</b> Overlays of Neu5Ac2en ( <b>1</b> ) and Neu5Ac9N <sub>3</sub> 2en ( <b>3</b> ), Neu5Gc9N <sub>3</sub> 2en ( <b>4</b> ), or Neu5AcN <sub>3</sub> 9N <sub>3</sub> 2en ( <b>5</b> ) in the crystal structures of human NEU2 and <i>V. cholerae</i> sialidase ..... | S2      |
| <sup>1</sup> H NMR and <sup>13</sup> C NMR spectra of Neu5Ac9N <sub>3</sub> 2en <b>3</b> .....                                                                                                                                                                                   | S3–S4   |
| <sup>1</sup> H NMR and <sup>13</sup> C NMR spectra of Neu5Gc9N <sub>3</sub> 2en <b>4</b> .....                                                                                                                                                                                   | S5–S6   |
| <sup>1</sup> H NMR and <sup>13</sup> C NMR spectra of Neu5AcN <sub>3</sub> 9N <sub>3</sub> 2en <b>5</b> .....                                                                                                                                                                    | S7–S8   |
| <sup>1</sup> H NMR and <sup>13</sup> C NMR spectra of Neu5Ac9OMe2en <b>6</b> .....                                                                                                                                                                                               | S9–S10  |
| <sup>1</sup> H NMR and <sup>13</sup> C NMR spectra of Neu5Ac9NPro2en <b>7</b> .....                                                                                                                                                                                              | S11–S12 |

**Figure S1.** Overlays of Neu5Ac2en (**1**) (C atoms: cyan) and Neu5Ac9N<sub>3</sub>2en (**3**), Neu5Gc9N<sub>3</sub>2en (**4**), or Neu5AcN<sub>3</sub>9N<sub>3</sub>2en (**5**) (Compounds **3–5**, C atoms: green) in the crystal structures of human NEU2 (**A**) and *V. cholerae* sialidase (**B**). The surfaces of proteins are colored according to the electrostatic potential. Positive potentials are shown in blue, negative potentials are in red, and neutral potentials are in white.

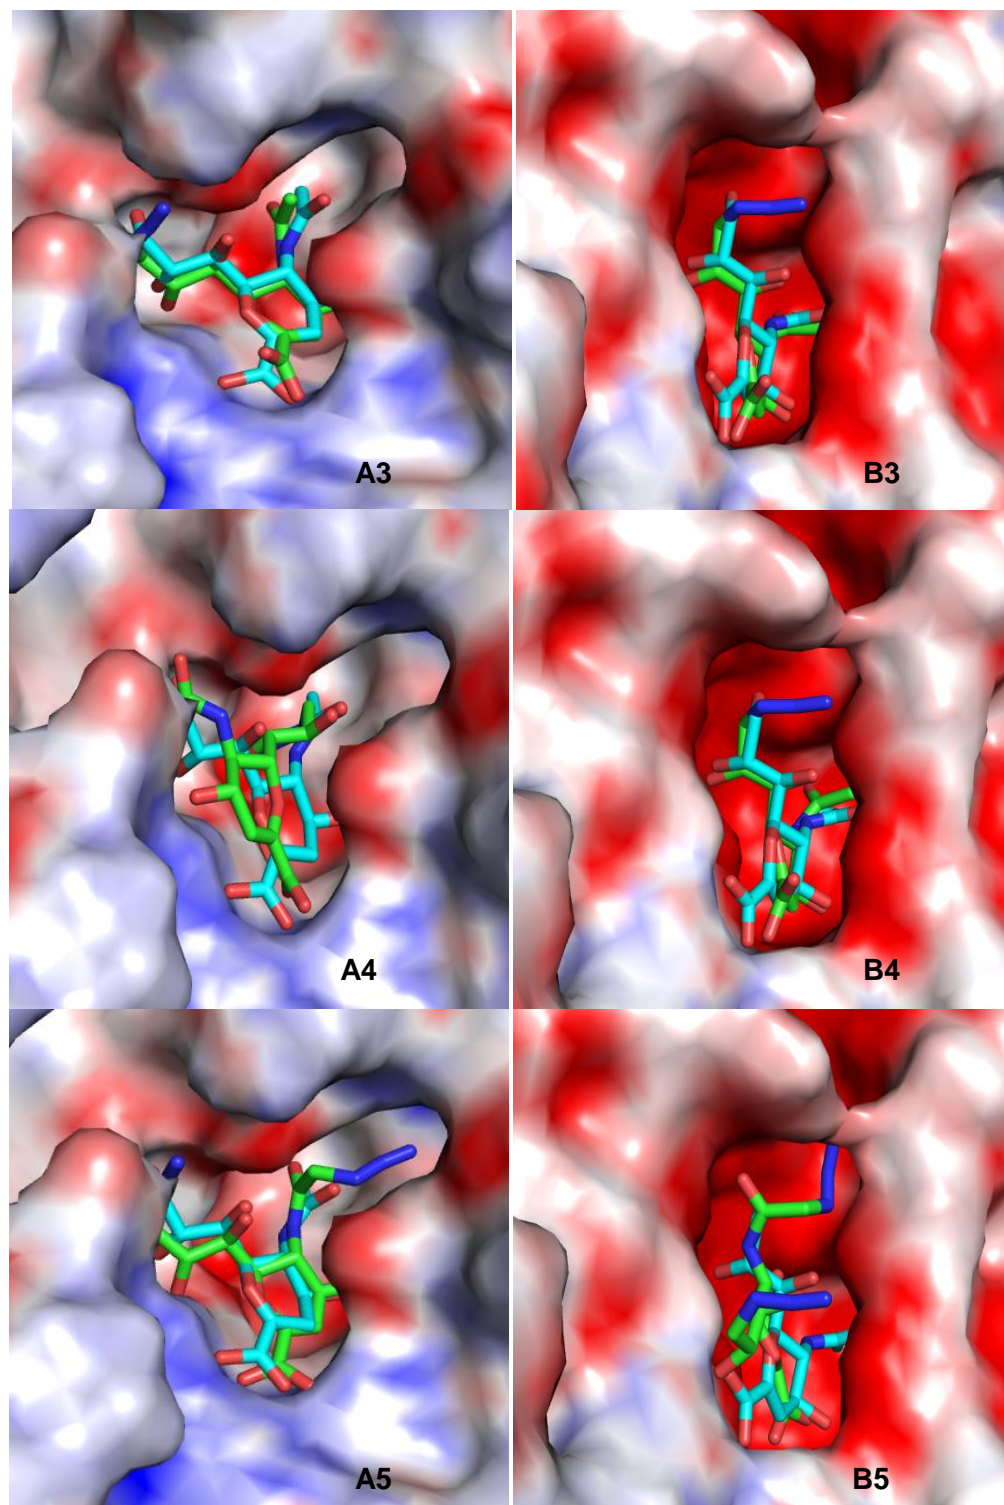

$^1\text{H}$  NMR spectrum of Neu5Ac9N<sub>3</sub>2en (**3**)

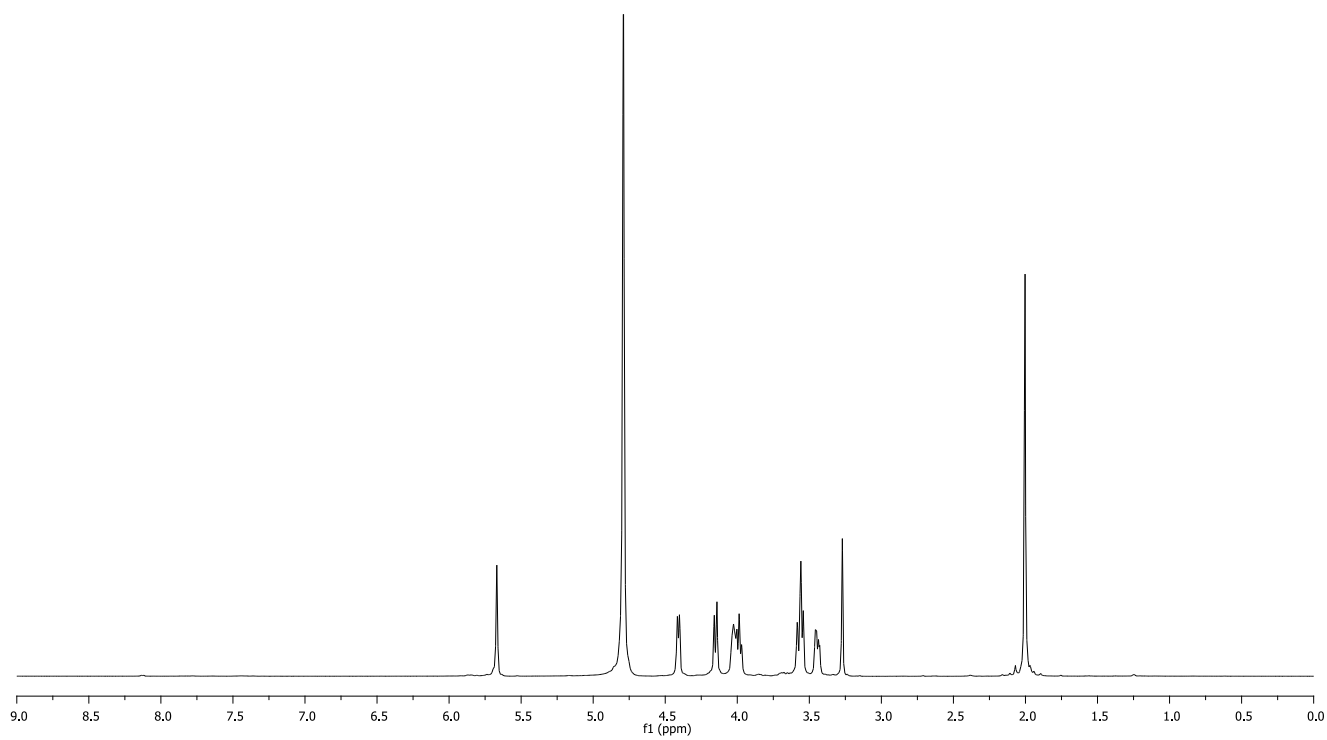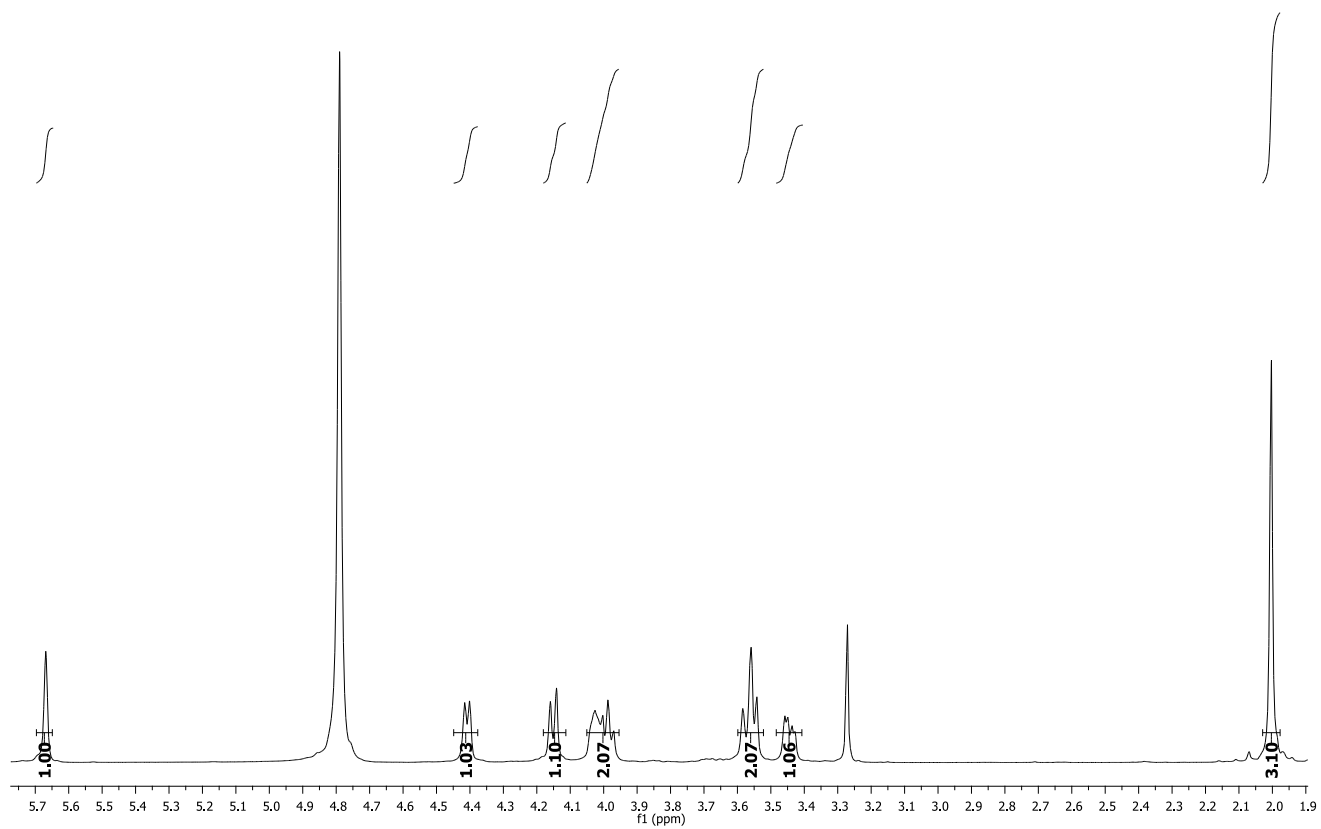

$^{13}\text{C}$  NMR spectrum of Neu5Ac9N<sub>3</sub>2en (**3**)

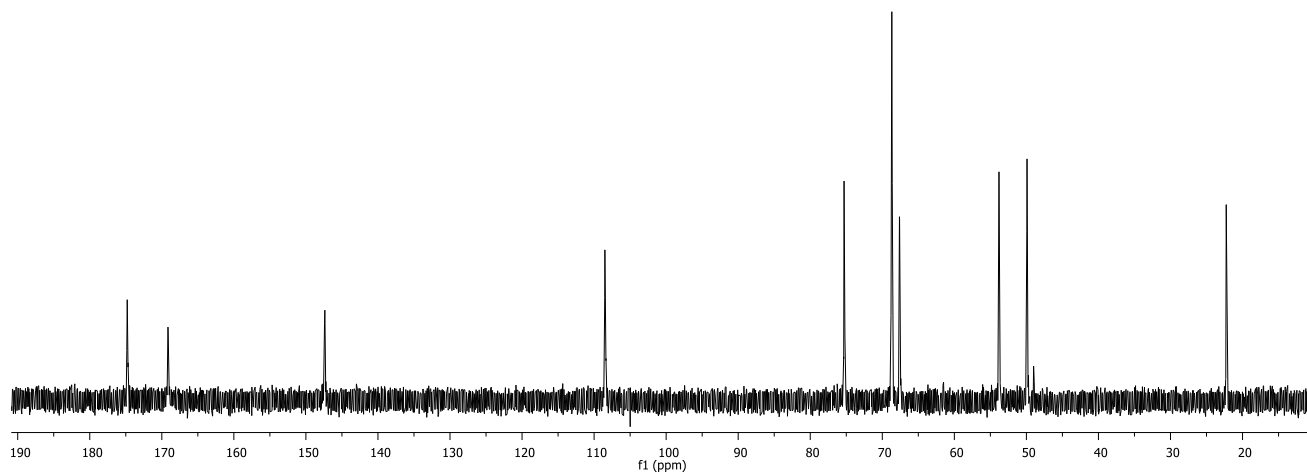

$^1\text{H}$  NMR spectrum of Neu5Gc9N<sub>3</sub>2en (**4**)

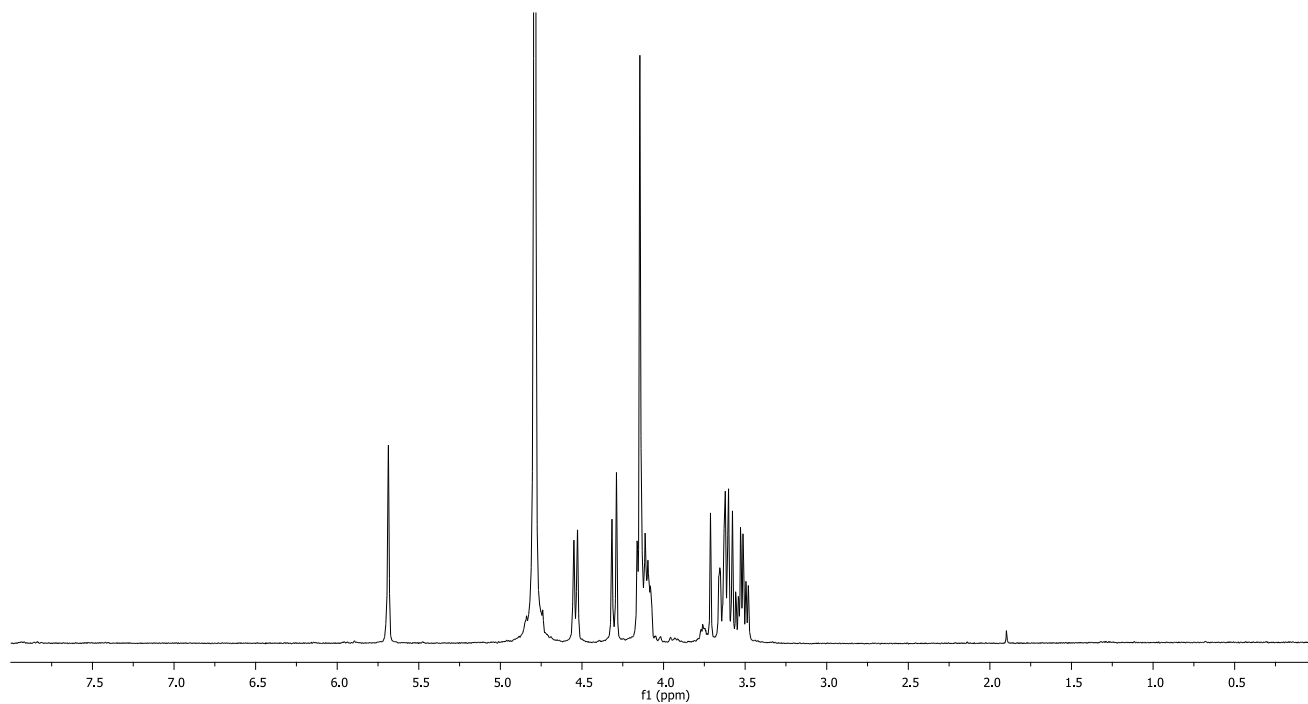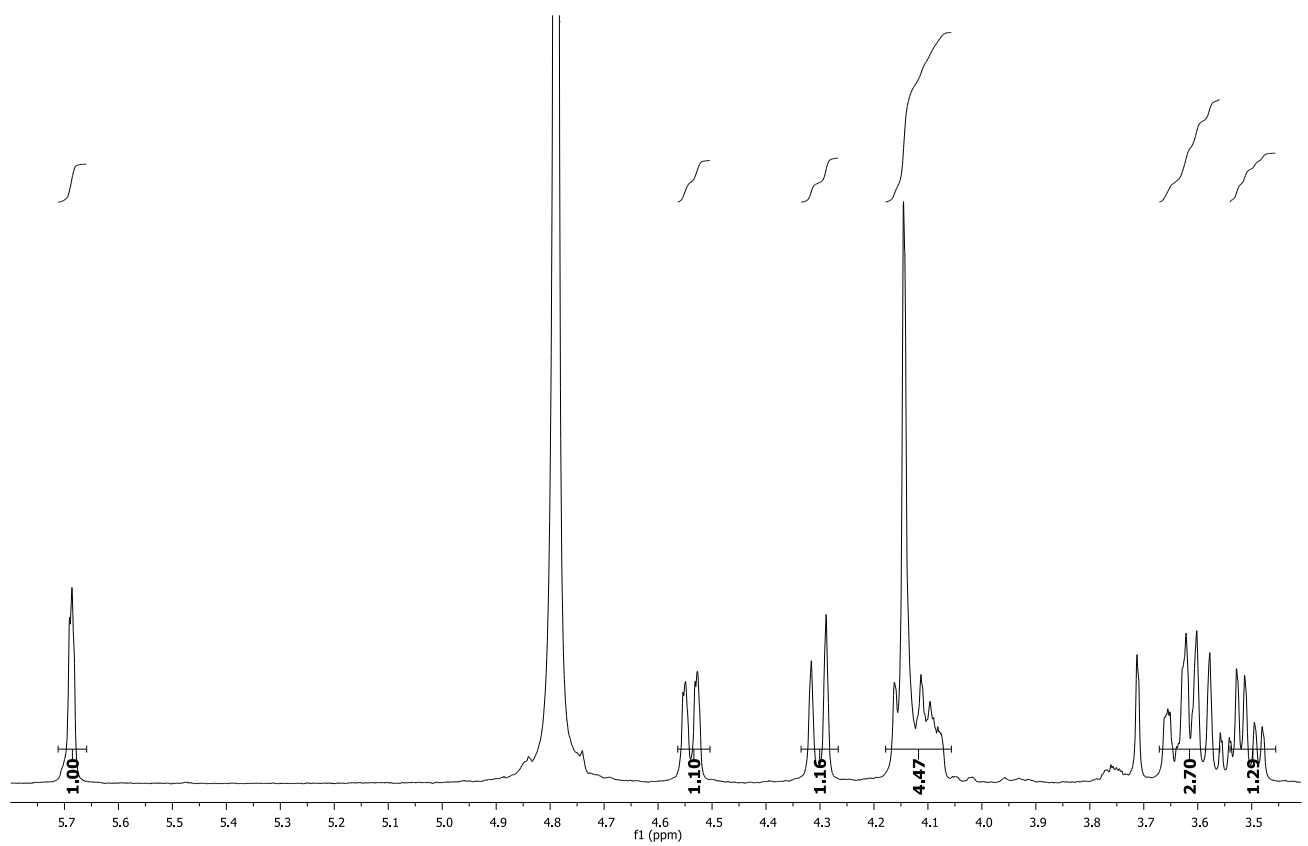

$^{13}\text{C}$  NMR spectrum of Neu5Gc9N<sub>3</sub>2en (4)

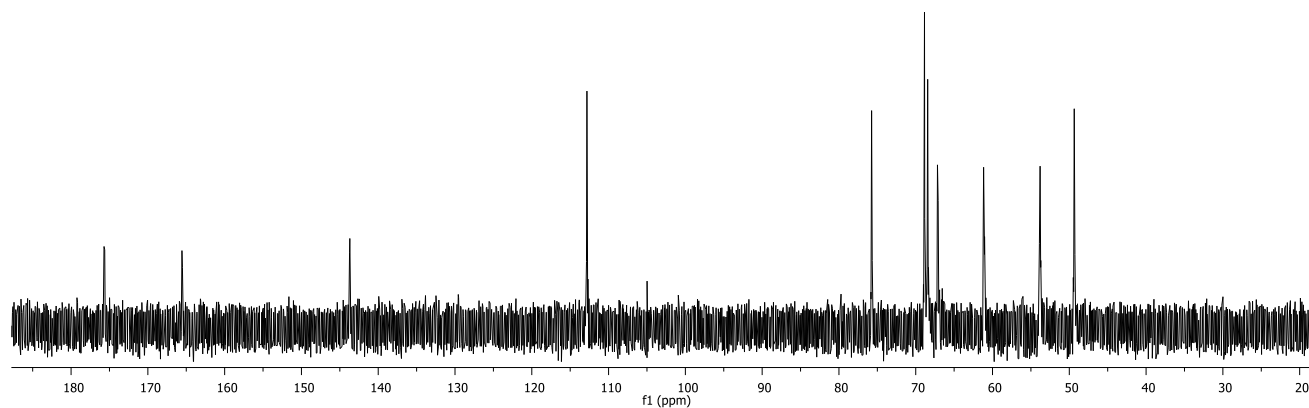

$^1\text{H}$  NMR spectrum of Neu5AcN<sub>3</sub>9N<sub>3</sub>2en (**5**)

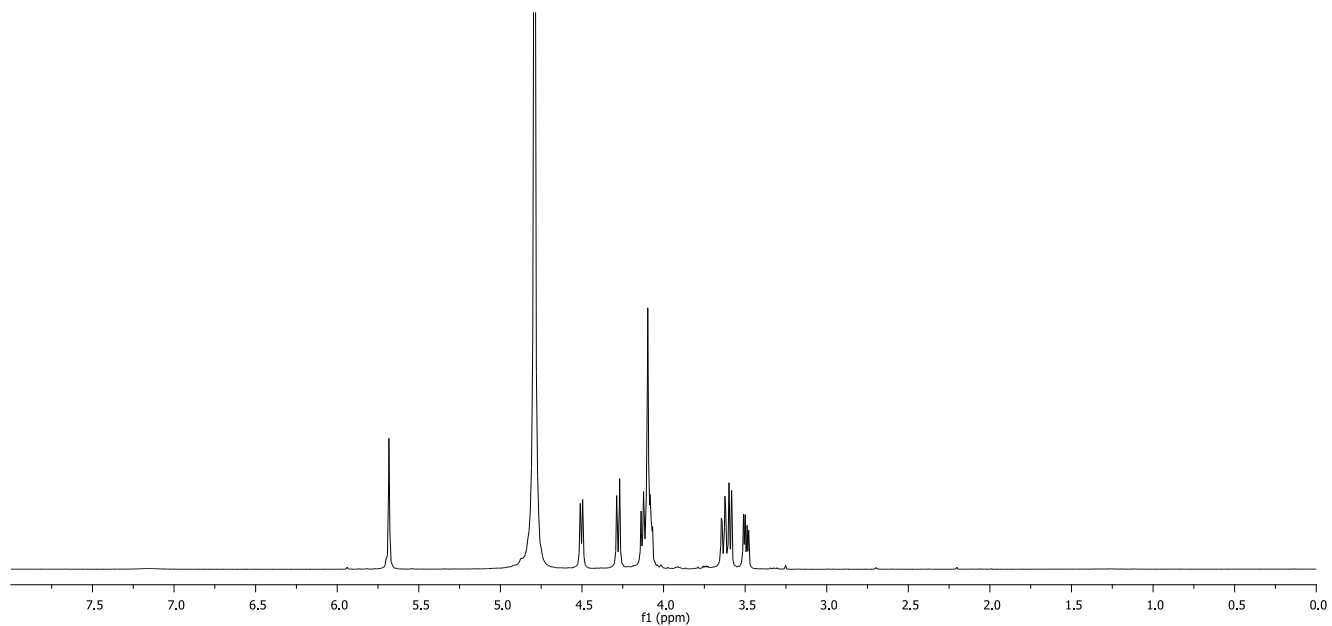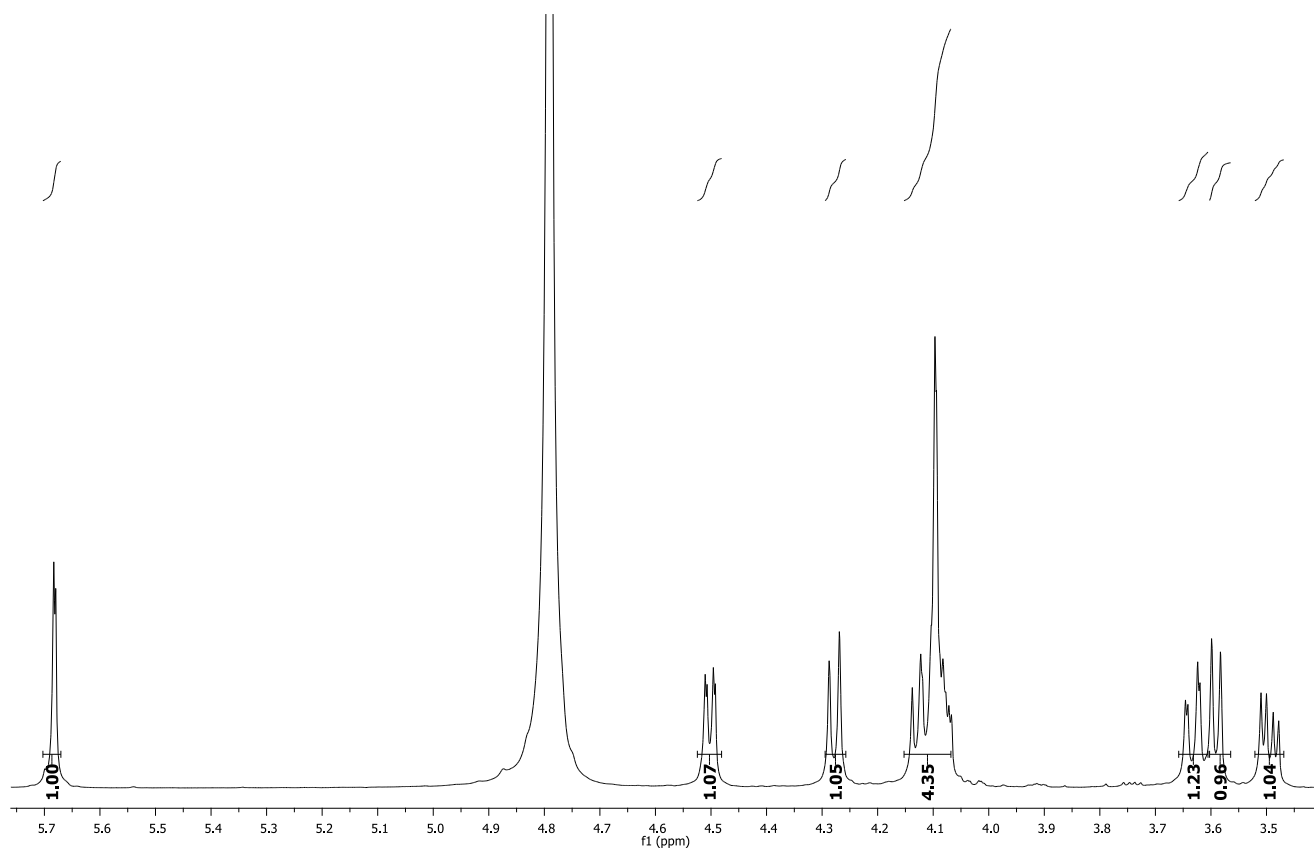

$^{13}\text{C}$  NMR spectrum of Neu5AcN<sub>3</sub>9N<sub>3</sub>2en (**5**)

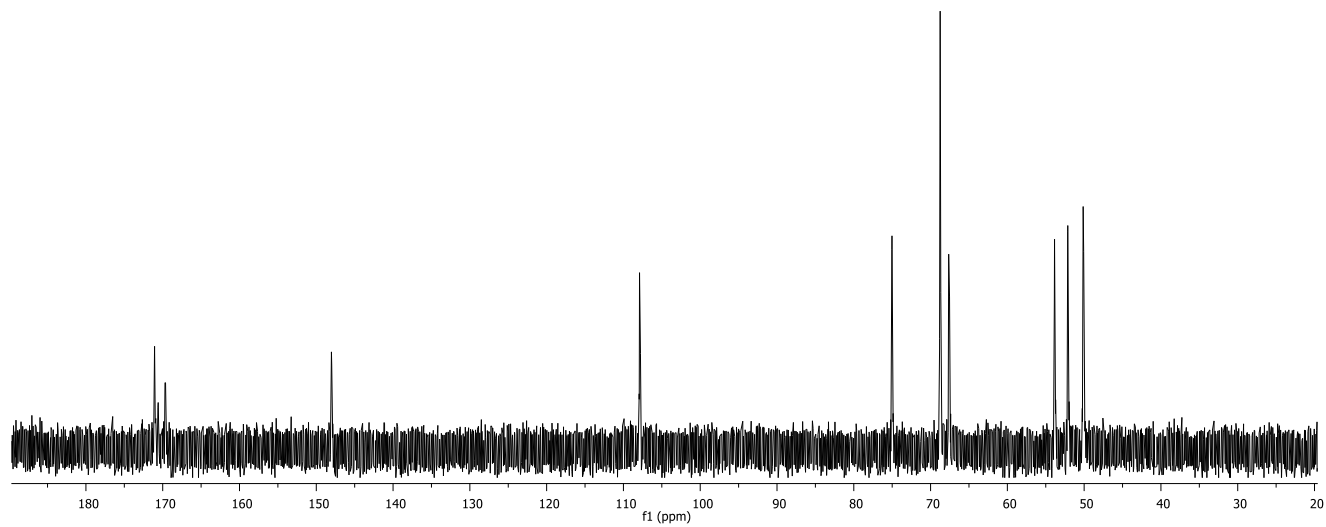



<sup>1</sup>H NMR spectrum of Neu5Ac9OMe2en (6)

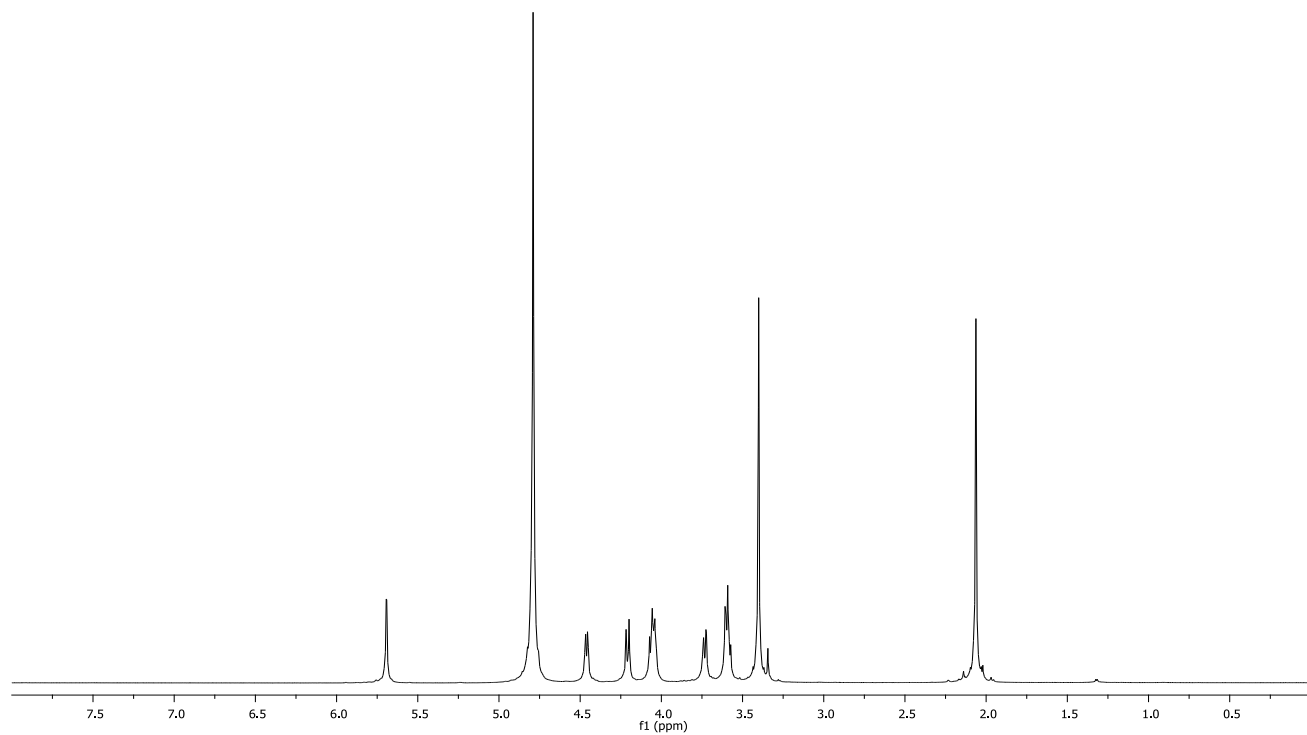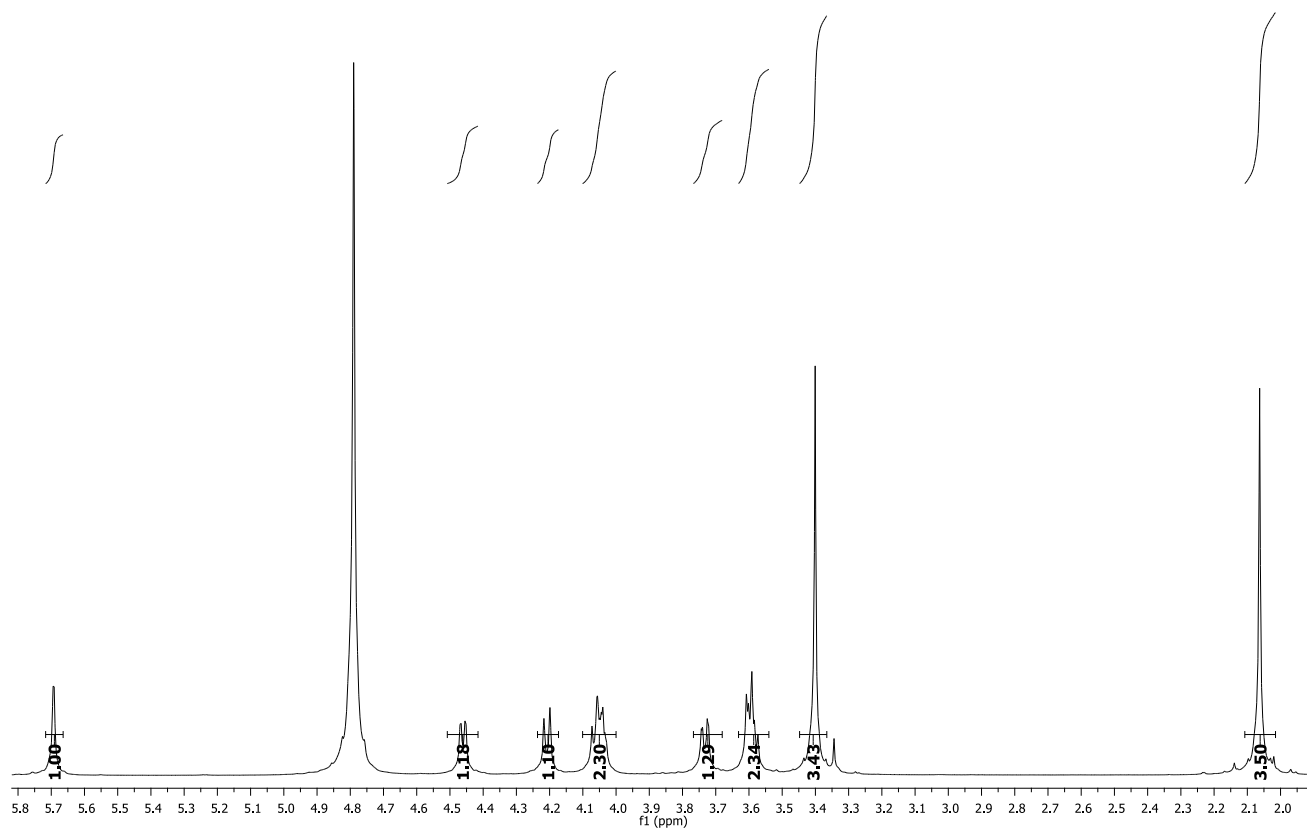

$^{13}\text{C}$  NMR spectrum of Neu5Ac9OMe2en (**6**)

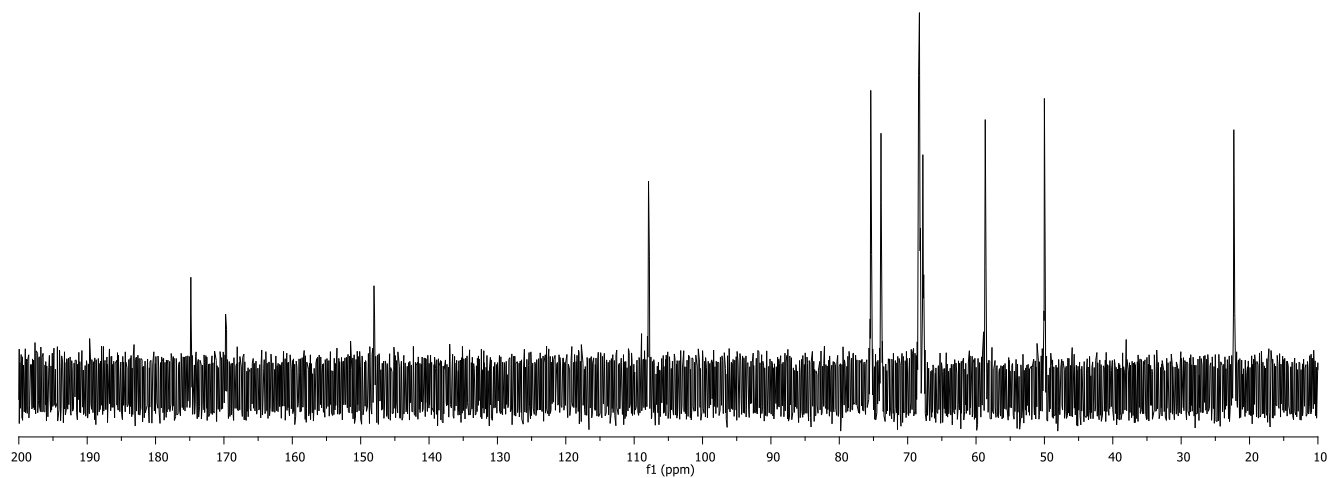

$^1\text{H}$  NMR spectrum of Neu5Ac9NPro2en (7)

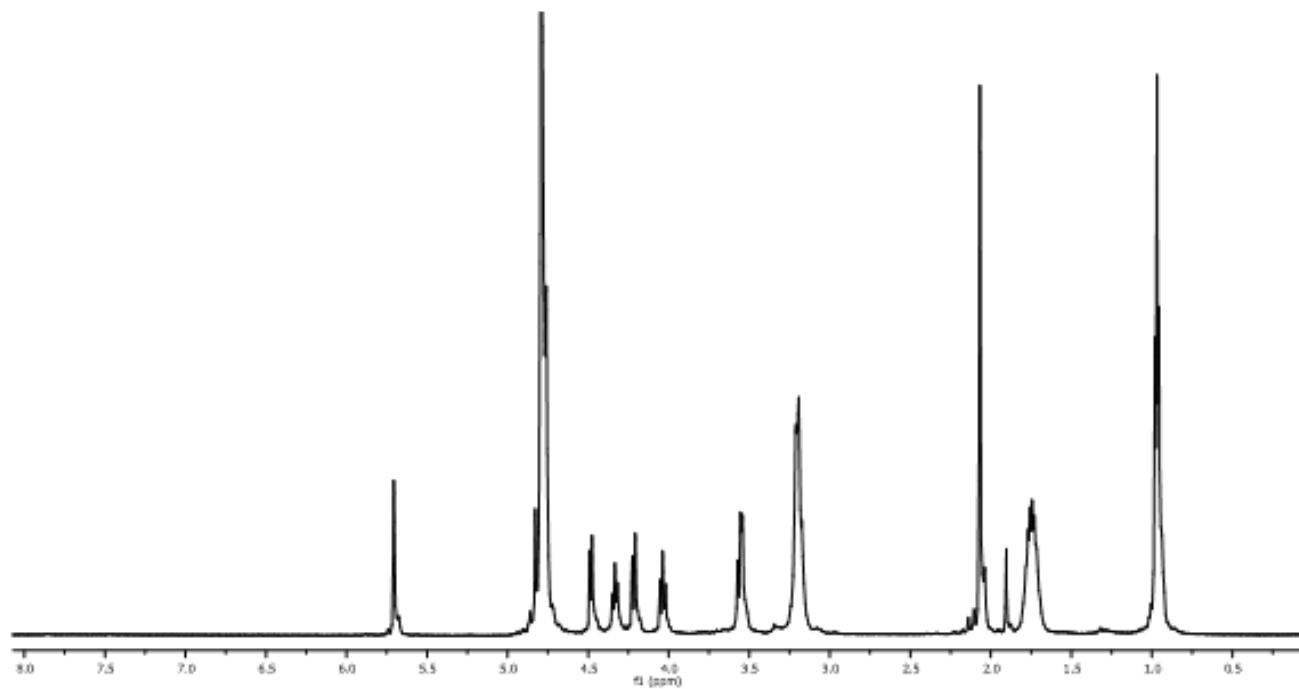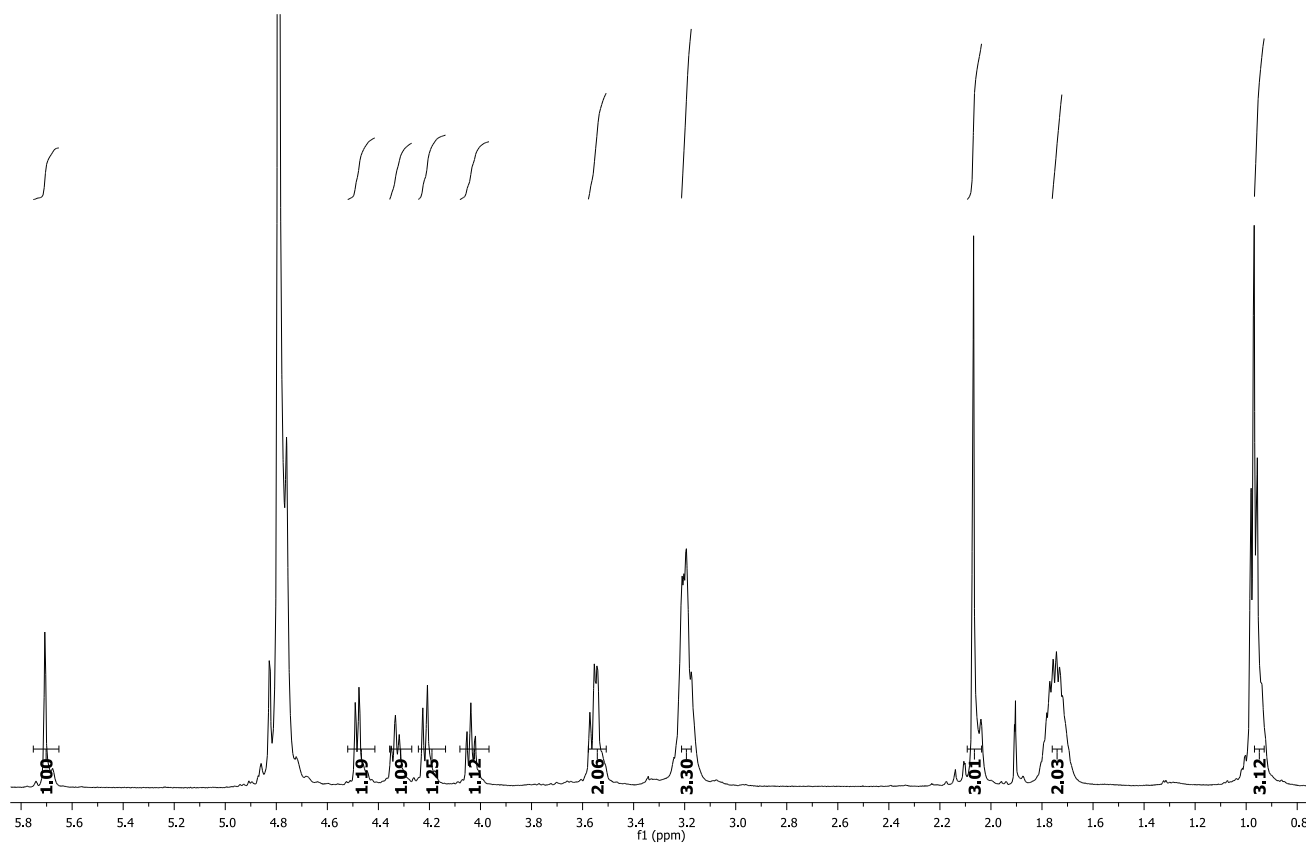

$^{13}\text{C}$  NMR spectrum of Neu5Ac9NPro2en (**7**)

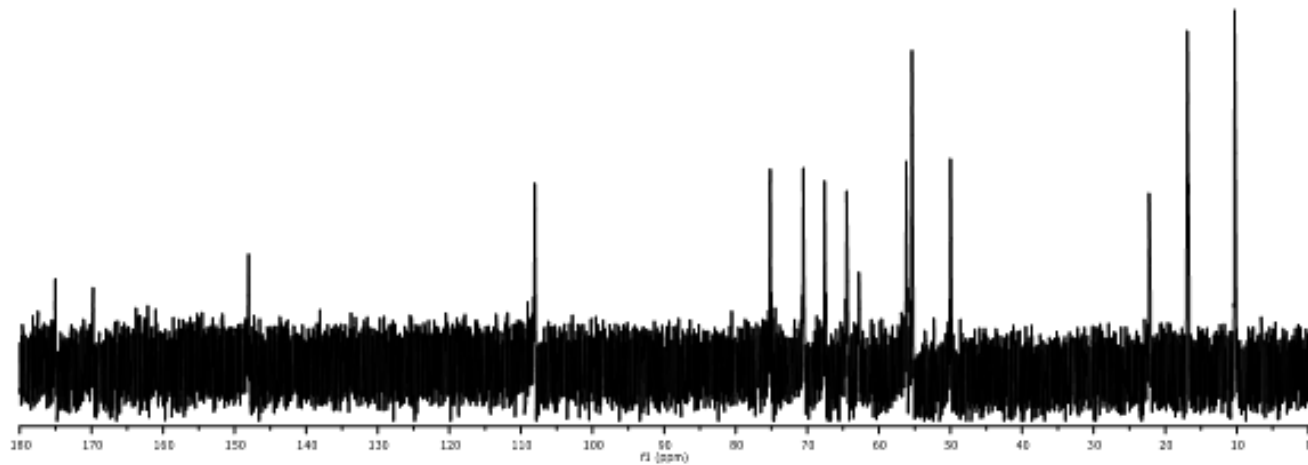

Supplement: NIHMS2011213-supplement-Supplementary_Information.pdf [file NIHMS2011213-supplement-Supplementary_Information.pdf]
